# Supplementary material for: Distinctive regulatory architectures of germline-active and somatic genes in C. elegans
Source: Genome Res. 2020 Dec;30(12):1752–65. doi: 10.1101/gr.265934.120 (PMC7706728; doi:10.1101/gr.265934.120)
Supplement: Supplemental Material [file supp_gr.265934.120_Supplemental_Table_S3.xlsx]

## Sheet: Supp_Table_3
## Supplemental Table S3. Motif enrichment in sets of ubiquitous or tissue-specific promoters
## (column 1) Motif name from Supplemental Fig S7. (column 2) Promoter class. (column 3) Range around TSS in which the motif was counted. (column 4) Number of promoters harboring the motif in the range indicated in column 3. (column 5) Number of promoters without the motif. (column 6) Enrichment score of motif in the promoter class compared to other promoter classes (Odds ratio from Fisher’s exac…
Motif	Promoter class	Range around TSS	Number of promoters with motif	Number of promoters without motif	Odds ratio	FDR
Inr	Ubiq.	-5..5	518	1534	0.679993	1
Inr	Germline	-5..5	134	381	0.741866	1
Inr	Neurons	-5..5	228	428	1.14443	0.237
Inr	Muscle	-5..5	257	497	1.11	0.372
Inr	Hypod.	-5..5	346	690	1.07615	0.521
Inr	Intest.	-5..5	390	704	1.20084	0.0151
Sp1	Ubiq.	-75..-25	110	1942	0.64936	1
Sp1	Germline	-75..-25	23	492	0.558105	1
Sp1	Neurons	-75..-25	109	547	2.60169	1.43e-14
Sp1	Muscle	-75..-25	68	685	1.22267	0.285
Sp1	Hypod.	-75..-25	104	932	1.39947	0.00814
Sp1	Intest.	-75..-25	40	1054	0.438538	1
TATA box	Ubiq.	-40..-20	144	1908	0.496488	1
TATA box	Germline	-40..-20	65	450	1.04029	1
TATA box	Neurons	-40..-20	41	615	0.465426	1
TATA box	Muscle	-40..-20	54	700	0.538854	1
TATA box	Hypod.	-40..-20	212	824	1.98255	1.43e-14
TATA box	Intest.	-40..-20	253	841	2.38632	4.22e-25
TT..TT	Ubiq.	0..100	746	1306	3.04022	1.67e-90
TT..TT	Germline	0..100	168	347	2.12869	3.94e-13
TT..TT	Neurons	0..100	90	566	0.661419	1
TT..TT	Muscle	0..100	81	673	0.493332	1
TT..TT	Hypod.	0..100	137	898	0.625619	1
TT..TT	Intest.	0..100	127	967	0.532383	1
T/C rich	Ubiq.	-100..0	96	1956	0.369148	1
T/C rich	Germline	-100..0	14	501	0.227542	1
T/C rich	Neurons	-100..0	157	499	2.8655	6.76e-23
T/C rich	Muscle	-100..0	101	652	1.32962	0.0304
T/C rich	Hypod.	-100..0	160	875	1.61253	1.76e-06
T/C rich	Intest.	-100..0	47	1047	0.356072	1
CA rich	Ubiq.	-100..0	13	2029	0.41437	1
CA rich	Germline	-100..0	1	512	0.134531	1
CA rich	Neurons	-100..0	10	646	1.11129	1
CA rich	Muscle	-100..0	12	741	1.16735	1
CA rich	Hypod.	-100..0	16	1016	1.13648	1
CA rich	Intest.	-100..0	7	1083	0.439236	1
Ubiquitous E2F	Ubiq.	-75..-25	207	1844	5.35089	4.11e-56
Ubiquitous E2F	Germline	-75..-25	14	501	0.803112	1
Ubiquitous E2F	Neurons	-75..-25	5	651	0.213347	1
Ubiquitous E2F	Muscle	-75..-25	3	751	0.109505	1
Ubiquitous E2F	Hypod.	-75..-25	1	1034	0.0257592	1
Ubiquitous E2F	Intest.	-75..-25	1	1093	0.0242428	1
Ubiquitous EOR-1	Ubiq.	-75..-25	186	1864	0.717983	1
Ubiquitous EOR-1	Germline	-75..-25	14	500	0.20385	1
Ubiquitous EOR-1	Neurons	-75..-25	74	582	0.957162	1
Ubiquitous EOR-1	Muscle	-75..-25	85	668	0.957611	1
Ubiquitous EOR-1	Hypod.	-75..-25	115	920	0.938342	1
Ubiquitous EOR-1	Intest.	-75..-25	51	1043	0.346775	1
Germline Motif 1	Ubiq.	-100..0	236	1814	5.12317	3.37e-61
Germline Motif 1	Germline	-100..0	159	355	15.5821	3.25e-102
Germline Motif 1	Neurons	-100..0	0	656	0	1
Germline Motif 1	Muscle	-100..0	2	748	0.0617983	1
Germline Motif 1	Hypod.	-100..0	0	1030	0	1
Germline Motif 1	Intest.	-100..0	2	1090	0.041141	1
Germline Motif 2	Ubiq.	-100..0	309	1743	2.02729	1.47e-20
Germline Motif 2	Germline	-100..0	240	275	10.6084	9.89e-115
Germline Motif 2	Neurons	-100..0	22	634	0.331623	1
Germline Motif 2	Muscle	-100..0	16	738	0.204185	1
Germline Motif 2	Hypod.	-100..0	73	963	0.735289	1
Germline Motif 2	Intest.	-100..0	74	1020	0.700603	1
Germline Motif 3	Ubiq.	-100..0	124	1926	3.77312	1.37e-24
Germline Motif 3	Germline	-100..0	126	388	22.0187	2.6e-96
Germline Motif 3	Neurons	-100..0	1	655	0.0596892	1
Germline Motif 3	Muscle	-100..0	1	749	0.0517866	1
Germline Motif 3	Hypod.	-100..0	1	1033	0.0366475	1
Germline Motif 3	Intest.	-100..0	1	1092	0.0344904	1
Germline Motif 4	Ubiq.	-100..0	79	1965	4.70493	4.96e-20
Germline Motif 4	Germline	-100..0	24	490	4.06721	4.43e-07
Germline Motif 4	Neurons	-100..0	0	653	0	1
Germline Motif 4	Muscle	-100..0	0	747	0	1
Germline Motif 4	Hypod.	-100..0	0	1028	0	1
Germline Motif 4	Intest.	-100..0	0	1083	0	1
Neuron Motif 1	Ubiq.	-50..0	8	2042	0.324278	1
Neuron Motif 1	Germline	-50..0	3	512	0.533784	1
Neuron Motif 1	Neurons	-50..0	21	635	3.44448	2.86e-05
Neuron Motif 1	Muscle	-50..0	23	730	3.31294	2.22e-05
Neuron Motif 1	Hypod.	-50..0	0	1036	0	1
Neuron Motif 1	Intest.	-50..0	12	1082	1.03249	1
Neuron Motif 2	Ubiq.	-75..-25	7	2043	0.333182	1
Neuron Motif 2	Germline	-75..-25	0	515	0	1
Neuron Motif 2	Neurons	-75..-25	36	620	8.68457	3.35e-18
Neuron Motif 2	Muscle	-75..-25	1	753	0.137231	1
Neuron Motif 2	Hypod.	-75..-25	3	1032	0.298543	1
Neuron Motif 2	Intest.	-75..-25	8	1086	0.787529	1
Muscle HLH-1	Ubiq.	-75..-25	117	1935	0.603639	1
Muscle HLH-1	Germline	-75..-25	27	488	0.580602	1
Muscle HLH-1	Neurons	-75..-25	38	618	0.644407	1
Muscle HLH-1	Muscle	-75..-25	189	565	4.10492	6.69e-44
Muscle HLH-1	Hypod.	-75..-25	67	969	0.721476	1
Muscle HLH-1	Intest.	-75..-25	84	1010	0.878982	1
Muscle Motif 1	Ubiq.	-100..0	329	1723	0.79719	1
Muscle Motif 1	Germline	-100..0	39	476	0.343318	1
Muscle Motif 1	Neurons	-100..0	136	520	1.13744	0.38
Muscle Motif 1	Muscle	-100..0	146	607	1.04144	1
Muscle Motif 1	Hypod.	-100..0	186	850	0.940642	1
Muscle Motif 1	Intest.	-100..0	97	997	0.396002	1
Muscle Motif 2	Ubiq.	-100..0	31	2019	0.304995	1
Muscle Motif 2	Germline	-100..0	11	504	0.478852	1
Muscle Motif 2	Neurons	-100..0	67	589	2.76535	1.12e-10
Muscle Motif 2	Muscle	-100..0	91	663	3.4892	3.73e-19
Muscle Motif 2	Hypod.	-100..0	4	1032	0.0801999	1
Muscle Motif 2	Intest.	-100..0	65	1029	1.47199	0.0168
Hypod. Motif 1	Ubiq.	-100..0	51	1986	0.906714	1
Hypod. Motif 1	Germline	-100..0	6	507	0.414047	1
Hypod. Motif 1	Neurons	-100..0	22	632	1.26438	0.589
Hypod. Motif 1	Muscle	-100..0	17	734	0.821366	1
Hypod. Motif 1	Hypod.	-100..0	40	988	1.50978	0.0532
Hypod. Motif 1	Intest.	-100..0	14	1072	0.445737	1
Intestine GATA motif	Ubiq.	-75..-25	48	2004	0.177343	1
Intestine GATA motif	Germline	-75..-25	6	509	0.09779	1
Intestine GATA motif	Neurons	-75..-25	11	645	0.14026	1
Intestine GATA motif	Muscle	-75..-25	46	708	0.545674	1
Intestine GATA motif	Hypod.	-75..-25	116	920	1.09785	0.638
Intestine GATA motif	Intest.	-75..-25	499	595	10.9739	8.57e-225
